# Supplementary material for: Conservation Genetics of Mediterranean Brown Trout in Central Italy (Latium): A Multi-Marker Approach
Source: MDPI journal article supplement (doi:10.3390/w14060937), 2022-03-17

## Electronic Supplementary Materials

### Conservation genetics of Mediterranean brown trout in central Italy (Latium): a multi-marker approach

Rossi A.R., Lorenzo Talarico L., Petrosino G., Crescenzo S. and Tancioni L.

**Table S1**

CR haplotypes and *LDH-C1* genotypes distribution across seven Mediterranean brown trout sampling sites, along with the frequency of the Atlantic and Mediterranean components are provided

| <b>CR haplotypes</b>                 | <b>CAR</b> | <b>MEL</b> | <b>RAP</b> | <b>SCR</b> | <b>SIM1</b> | <b>SIM2</b> | <b>TRO</b> | <b>Total</b> |
|--------------------------------------|------------|------------|------------|------------|-------------|-------------|------------|--------------|
| AD-1                                 |            |            |            |            | 12          | 9           |            | <b>21</b>    |
| AD-2                                 |            |            | 13         |            |             |             | 3          | <b>16</b>    |
| AD-3                                 |            |            | 2          |            |             |             | 2          | <b>4</b>     |
| ADPFB-1                              | 30         |            |            |            |             |             |            | <b>30</b>    |
| MA-1                                 |            |            | 15         |            |             |             | 2          | <b>17</b>    |
| MA-2                                 |            |            |            |            |             | 1           |            | <b>1</b>     |
| MA-3                                 |            |            |            |            |             |             | 8          | <b>8</b>     |
| ME-1                                 |            |            |            | 23         |             |             |            | <b>23</b>    |
| ME-2                                 |            |            |            |            |             |             | 9          | <b>9</b>     |
| AT-1                                 |            | 27         |            | 7          | 1           | 4           | 1          | <b>40</b>    |
| AT-2                                 |            | 3          |            |            | 3           |             |            | <b>6</b>     |
| <b>Total</b>                         | <b>30</b>  | <b>30</b>  | <b>30</b>  | <b>30</b>  | <b>16</b>   | <b>14</b>   | <b>25</b>  | <b>175</b>   |
| <b>Atlantic haplotypes (%)</b>       | 0.0        | 100.0      | 0.0        | 23.3       | 25.0        | 28.6        | 4.0        | <b>26.3</b>  |
| <b>Mediterranean haplotypes (%)</b>  | 100.0      | 0.0        | 100.0      | 77.7       | 75.0        | 71.4        | 96.0       | <b>73.7</b>  |
| <b>LDH-C1 genotypes</b>              | <b>CAR</b> | <b>MEL</b> | <b>RAP</b> | <b>SCR</b> | <b>SIM1</b> | <b>SIM2</b> | <b>TRO</b> | <b>Total</b> |
| *90/*90                              |            | 24         | 9          |            | 1           | 6           | 6          | <b>46</b>    |
| *90/*100                             | 8          | 6          | 13         | 3          | 7           | 5           | 10         | <b>52</b>    |
| *100/*100                            | 22         |            | 8          | 27         | 8           | 3           | 9          | <b>77</b>    |
| <b>Total</b>                         | <b>30</b>  | <b>30</b>  | <b>30</b>  | <b>30</b>  | <b>16</b>   | <b>14</b>   | <b>25</b>  | <b>175</b>   |
| <b>Atlantic *90 allele (%)</b>       | 13.3       | 90.0       | 51.7       | 5.0        | 28.1        | 60.7        | 44.0       | <b>13.3</b>  |
| <b>Mediterranean *100 allele (%)</b> | 86.7       | 10.0       | 48.3       | 95.0       | 71.9        | 39.3        | 56.0       | <b>86.7</b>  |

**Table S2**

Microsatellites genotypes (11 loci) of additional 19 individuals examined in this study for the first time, and thus not reported in Talarico et al. (2021).

|                 | STR60 |    | STR73 |     | SSOSL417 |     | SSA408UOS |     | OMM_1064 |     | SSAD190 |     | SSSP2213 |     | SSA85 |     | ONE_mu2 |     | SSA410UOS |     | SSA413NVH |     |
|-----------------|-------|----|-------|-----|----------|-----|-----------|-----|----------|-----|---------|-----|----------|-----|-------|-----|---------|-----|-----------|-----|-----------|-----|
| <i>CARP_006</i> | 94    | 94 | 140   | 140 | 166      | 166 | 259       | 303 | 184      | 252 | 136     | 136 | 196      | 196 | 101   | 101 | 223     | 245 | 247       | 287 | 88        | 88  |
| <i>CARP_018</i> | 94    | 98 | 140   | 146 | 170      | 172 | 233       | 279 | 190      | 260 | 124     | 124 | 164      | 164 | 101   | 101 | 221     | 227 | 247       | 291 | 88        | 88  |
| <i>MEL_001</i>  | 94    | 94 | 140   | 146 | 172      | 174 | 219       | 259 | 190      | 228 | 114     | 114 | 168      | 184 | 111   | 111 | 245     | 245 | 239       | 251 | 104       | 106 |
| <i>MEL_011</i>  | 94    | 94 | 140   | 140 | 180      | 192 | 247       | 259 | 178      | 188 | 144     | 152 | 168      | 188 | 111   | 113 | 245     | 249 | 195       | 195 | 118       | 122 |
| <i>MEL_030</i>  | 94    | 94 | 140   | 144 | 172      | 192 | 219       | 259 | 178      | 218 | 114     | 152 | 168      | 208 | 111   | 111 | 245     | 249 | 195       | 211 | 104       | 118 |
| <i>RAP_001</i>  | 94    | 94 | 142   | 146 | 166      | 166 | 259       | 265 | 200      | 244 | 114     | 144 | 180      | 184 | 105   | 115 | 245     | 261 | 195       | 239 | 110       | 120 |
| <i>RAP_007</i>  | 94    | 94 | 142   | 146 | 166      | 188 | 265       | 279 | 190      | 200 | 124     | 132 | 176      | 192 | 109   | 113 | 217     | 245 | 179       | 231 | 106       | 150 |
| <i>RAP_019</i>  | 94    | 94 | 140   | 142 | 178      | 180 | 259       | 279 | 200      | 200 | 114     | 124 | 180      | 184 | 105   | 115 | 245     | 261 | 195       | 195 | 120       | 128 |
| <i>RAP_020</i>  | 94    | 94 | 146   | 146 | 166      | 166 | 259       | 279 | 200      | 236 | 114     | 124 | 180      | 180 | 113   | 115 | 245     | 261 | 195       | 239 | 120       | 150 |
| <i>RAP_021</i>  | 94    | 94 | 140   | 146 | 166      | 182 | 203       | 279 | 200      | 256 | 124     | 124 | 180      | 220 | 105   | 105 | 245     | 261 | 239       | 271 | 110       | 114 |
| <i>SCR_012</i>  | 94    | 94 | 142   | 142 | 166      | 166 | 265       | 267 | 220      | 220 | 136     | 136 | 192      | 212 | 103   | 103 | 221     | 221 | 369       | 369 | 0         | 0   |
| <i>SCR_024</i>  | 94    | 94 | 142   | 142 | 166      | 172 | 247       | 287 | 220      | 220 | 114     | 136 | 192      | 192 | 103   | 103 | 0       | 0   | 267       | 369 | 150       | 150 |
| <i>SCR_026</i>  | 94    | 94 | 142   | 142 | 166      | 166 | 247       | 267 | 220      | 220 | 136     | 160 | 192      | 192 | 103   | 103 | 221     | 221 | 267       | 369 | 150       | 150 |
| <i>SCR_029</i>  | 94    | 94 | 140   | 142 | 166      | 180 | 265       | 299 | 220      | 220 | 114     | 136 | 192      | 212 | 103   | 103 | 245     | 245 | 373       | 373 | 150       | 150 |
| <i>SIM1_006</i> | 94    | 96 | 140   | 144 | 174      | 180 | 231       | 251 | 164      | 196 | 132     | 144 | 172      | 176 | 113   | 113 | 213     | 245 | 219       | 247 | 106       | 132 |
| <i>SIM2_010</i> | 94    | 94 | 140   | 140 | 166      | 176 | 271       | 275 | 174      | 278 | 124     | 136 | 164      | 168 | 105   | 107 | 245     | 245 | 159       | 187 | 88        | 88  |
| <i>SIM2_013</i> | 94    | 94 | 140   | 146 | 174      | 174 | 233       | 233 | 200      | 200 | 114     | 114 | 164      | 176 | 105   | 115 | 213     | 245 | 291       | 291 | 142       | 142 |
| <i>TRO_004</i>  | 94    | 98 | 140   | 140 | 178      | 180 | 223       | 255 | 244      | 252 | 132     | 136 | 180      | 192 | 105   | 115 | 227     | 245 | 179       | 199 | 88        | 134 |
| <i>TRO_013</i>  | 94    | 94 | 140   | 144 | 178      | 188 | 235       | 259 | 180      | 208 | 124     | 186 | 176      | 192 | 105   | 105 | 227     | 227 | 179       | 179 | 118       | 118 |

### Table S3

Results of exact tests for Hardy-Weinberg equilibrium in seven Mediterranean brown trout sampling sites. Bonferroni adjusted p-values are provided for the *LDH-C1* gene, 11 microsatellite loci and the MHC-*DAB*. Statistically significant values ( $p < 0.05$ ) are in bold.

[illegible]

**Table S4**

Frequency of null alleles at the *LDH-C1* gene, 11 microsatellite loci and the MHC-*DAB* across seven sampling sites. Frequencies > 10% are given in bold.

| <i>LDH-C1</i> |      | Microsatellite loci |       |             |           |          |         |          |       |             |           | MHC- <i>DAB</i> |             |
|---------------|------|---------------------|-------|-------------|-----------|----------|---------|----------|-------|-------------|-----------|-----------------|-------------|
|               |      | STR60               | STR73 | SSOSL417    | SSA408UOS | OMM_1064 | SSAD190 | SSSP2213 | SSA85 | ONE_μ2      | SSA410UOS | SSA413NVH       |             |
| <b>CAR</b>    | 0.00 | 0.00                | 0.00  | 0.00        | 0.03      | 0.00     | 0.01    | 0.05     | 0.00  | 0.08        | 0.01      | 0.00            | 0.00        |
| <b>MEL</b>    | 0.00 | 0.01                | 0.00  | 0.00        | 0.01      | 0.00     | 0.00    | 0.03     | 0.02  | <b>0.13</b> | 0.02      | 0.00            | 0.00        |
| <b>RAP</b>    | 0.04 | 0.00                | 0.00  | 0.00        | 0.00      | 0.00     | 0.00    | 0.00     | 0.00  | 0.02        | 0.00      | 0.00            | 0.00        |
| <b>SCR</b>    | 0.00 | 0.00                | 0.00  | 0.00        | 0.00      | 0.04     | 0.00    | 0.00     | 0.00  | <b>0.16</b> | 0.00      | 0.00            | 0.03        |
| <b>SIM1</b>   | 0.00 | 0.00                | 0.00  | 0.00        | 0.00      | 0.00     | 0.03    | 0.00     | 0.00  | 0.03        | 0.00      | 0.00            | <b>0.11</b> |
| <b>SIM2</b>   | 0.08 | 0.00                | 0.05  | <b>0.11</b> | 0.00      | 0.00     | 0.05    | 0.00     | 0.00  | 0.00        | 0.02      | 0.01            | 0.06        |
| <b>TRO</b>    | 0.06 | 0.00                | 0.02  | 0.00        | 0.00      | 0.00     | 0.00    | 0.00     | 0.04  | 0.03        | 0.02      | 0.02            | 0.00        |

**Table S5**

Tests of linkage disequilibrium between pairs of nuclear markers (11 STRs, *LDH-C1* gene, *MHC-DAB*) across seven sampling sites. Results are sorted by site (alphabetically) and increasing p-value (after Bonferroni correction).

| Site | locus1        | locus2         | p | CAR | SSAD190  | <i>LDH-C1</i>  | 1 | CAR | STR60    | SSA85          | 1  |
|------|---------------|----------------|---|-----|----------|----------------|---|-----|----------|----------------|----|
| CAR  | <i>LDH-C1</i> | <i>MHC-DAB</i> | 1 | CAR | SSAD190  | <i>MHC-DAB</i> | 1 | CAR | STR60    | SSAD190        | 1  |
| CAR  | OMM_1064      | <i>LDH-C1</i>  | 1 | CAR | SSAD190  | ONE_phi2       | 1 | CAR | STR60    | SSOSL417       | 1  |
| CAR  | OMM_1064      | <i>MHC-DAB</i> | 1 | CAR | SSAD190  | SSA410UO       | 1 | CAR | STR60    | SSSP2213       | 1  |
| CAR  | OMM_1064      | ONE_phi2       | 1 | CAR | SSAD190  | SSA85          | 1 | CAR | STR60    | STR73          | 1  |
| CAR  | OMM_1064      | SSA410UO       | 1 | CAR | SSAD190  | SSSP2213       | 1 | CAR | STR73    | <i>LDH-C1</i>  | 1  |
| CAR  | OMM_1064      | SSA85          | 1 | CAR | SSOSL417 | <i>LDH-C1</i>  | 1 | CAR | STR73    | <i>MHC-DAB</i> | 1  |
| CAR  | OMM_1064      | SSAD190        | 1 | CAR | SSOSL417 | <i>MHC-DAB</i> | 1 | CAR | STR73    | OMM_1064       | 1  |
| CAR  | OMM_1064      | SSSP2213       | 1 | CAR | SSOSL417 | OMM_1064       | 1 | CAR | STR73    | ONE_phi2       | 1  |
| CAR  | ONE_phi2      | <i>LDH-C1</i>  | 1 | CAR | SSOSL417 | ONE_phi2       | 1 | CAR | STR73    | SSA408UO       | 1  |
| CAR  | ONE_phi2      | <i>MHC-DAB</i> | 1 | CAR | SSOSL417 | SSA408UO       | 1 | CAR | STR73    | SSA410UO       | 1  |
| CAR  | ONE_phi2      | SSA410UO       | 1 | CAR | SSOSL417 | SSA410UO       | 1 | CAR | STR73    | SSA85          | 1  |
| CAR  | SSA408UO      | <i>LDH-C1</i>  | 1 | CAR | SSOSL417 | SSA85          | 1 | CAR | STR73    | SSAD190        | 1  |
| CAR  | SSA408UO      | <i>MHC-DAB</i> | 1 | CAR | SSOSL417 | SSAD190        | 1 | CAR | STR73    | SSOSL417       | 1  |
| CAR  | SSA408UO      | OMM_1064       | 1 | CAR | SSOSL417 | SSSP2213       | 1 | CAR | STR73    | SSSP2213       | 1  |
| CAR  | SSA408UO      | ONE_phi2       | 1 | CAR | SSSP2213 | <i>LDH-C1</i>  | 1 | CAR | OMM_1064 | SSA413NV       | na |
| CAR  | SSA408UO      | SSA410UO       | 1 | CAR | SSSP2213 | <i>MHC-DAB</i> | 1 | CAR | ONE_phi2 | SSA413NV       | na |
| CAR  | SSA408UO      | SSA85          | 1 | CAR | SSSP2213 | ONE_phi2       | 1 | CAR | SSA408UO | SSA413NV       | na |
| CAR  | SSA408UO      | SSAD190        | 1 | CAR | SSSP2213 | SSA410UO       | 1 | CAR | SSA410UO | SSA413NV       | na |
| CAR  | SSA408UO      | SSSP2213       | 1 | CAR | SSSP2213 | SSA85          | 1 | CAR | SSA413NV | <i>LDH-C1</i>  | na |
| CAR  | SSA410UO      | <i>LDH-C1</i>  | 1 | CAR | STR60    | <i>LDH-C1</i>  | 1 | CAR | SSA413NV | <i>MHC-DAB</i> | na |
| CAR  | SSA410UO      | <i>MHC-DAB</i> | 1 | CAR | STR60    | <i>MHC-DAB</i> | 1 | CAR | SSA85    | SSA413NV       | na |
| CAR  | SSA85         | <i>LDH-C1</i>  | 1 | CAR | STR60    | OMM_1064       | 1 | CAR | SSAD190  | SSA413NV       | na |
| CAR  | SSA85         | <i>MHC-DAB</i> | 1 | CAR | STR60    | ONE_phi2       | 1 | CAR | SSOSL417 | SSA413NV       | na |
| CAR  | SSA85         | ONE_phi2       | 1 | CAR | STR60    | SSA408UO       | 1 | CAR | SSSP2213 | SSA413NV       | na |
| CAR  | SSA85         | SSA410UO       | 1 | CAR | STR60    | SSA410UO       | 1 | CAR | STR60    | SSA413NV       | na |

|            |               |               |    |
|------------|---------------|---------------|----|
| <b>CAR</b> | STR73         | SSA413NV      | na |
| <b>MEL</b> | <i>LDH-C1</i> | MHC-DAB       | 1  |
| <b>MEL</b> | OMM_1064      | <i>LDH-C1</i> | 1  |
| <b>MEL</b> | OMM_1064      | MHC-DAB       | 1  |
| <b>MEL</b> | OMM_1064      | ONE_phi2      | 1  |
| <b>MEL</b> | OMM_1064      | SSA410UO      | 1  |
| <b>MEL</b> | OMM_1064      | SSA413NV      | 1  |
| <b>MEL</b> | OMM_1064      | SSA85         | 1  |
| <b>MEL</b> | OMM_1064      | SSAD190       | 1  |
| <b>MEL</b> | OMM_1064      | SSSP2213      | 1  |
| <b>MEL</b> | ONE_phi2      | <i>LDH-C1</i> | 1  |
| <b>MEL</b> | ONE_phi2      | MHC-DAB       | 1  |
| <b>MEL</b> | ONE_phi2      | SSA410UO      | 1  |
| <b>MEL</b> | ONE_phi2      | SSA413NV      | 1  |
| <b>MEL</b> | SSA408UO      | <i>LDH-C1</i> | 1  |
| <b>MEL</b> | SSA408UO      | MHC-DAB       | 1  |
| <b>MEL</b> | SSA408UO      | OMM_1064      | 1  |
| <b>MEL</b> | SSA408UO      | ONE_phi2      | 1  |
| <b>MEL</b> | SSA408UO      | SSA410UO      | 1  |
| <b>MEL</b> | SSA408UO      | SSA413NV      | 1  |
| <b>MEL</b> | SSA408UO      | SSA85         | 1  |
| <b>MEL</b> | SSA408UO      | SSAD190       | 1  |
| <b>MEL</b> | SSA408UO      | SSSP2213      | 1  |
| <b>MEL</b> | SSA410UO      | <i>LDH-C1</i> | 1  |
| <b>MEL</b> | SSA410UO      | MHC-DAB       | 1  |
| <b>MEL</b> | SSA410UO      | SSA413NV      | 1  |
| <b>MEL</b> | SSA413NV      | <i>LDH-C1</i> | 1  |
| <b>MEL</b> | SSA413NV      | MHC-DAB       | 1  |
| <b>MEL</b> | SSA85         | <i>LDH-C1</i> | 1  |
| <b>MEL</b> | SSA85         | MHC-DAB       | 1  |
| <b>MEL</b> | SSA85         | ONE_phi2      | 1  |
| <b>MEL</b> | SSA85         | SSA410UO      | 1  |

|            |          |               |   |
|------------|----------|---------------|---|
| <b>MEL</b> | SSA85    | SSA413NV      | 1 |
| <b>MEL</b> | SSAD190  | <i>LDH-C1</i> | 1 |
| <b>MEL</b> | SSAD190  | MHC-DAB       | 1 |
| <b>MEL</b> | SSAD190  | ONE_phi2      | 1 |
| <b>MEL</b> | SSAD190  | SSA410UO      | 1 |
| <b>MEL</b> | SSAD190  | SSA413NV      | 1 |
| <b>MEL</b> | SSAD190  | SSA85         | 1 |
| <b>MEL</b> | SSAD190  | SSSP2213      | 1 |
| <b>MEL</b> | SSOSL417 | <i>LDH-C1</i> | 1 |
| <b>MEL</b> | SSOSL417 | MHC-DAB       | 1 |
| <b>MEL</b> | SSOSL417 | OMM_1064      | 1 |
| <b>MEL</b> | SSOSL417 | ONE_phi2      | 1 |
| <b>MEL</b> | SSOSL417 | SSA408UO      | 1 |
| <b>MEL</b> | SSOSL417 | SSA410UO      | 1 |
| <b>MEL</b> | SSOSL417 | SSA413NV      | 1 |
| <b>MEL</b> | SSOSL417 | SSA85         | 1 |
| <b>MEL</b> | SSOSL417 | SSAD190       | 1 |
| <b>MEL</b> | SSOSL417 | SSSP2213      | 1 |
| <b>MEL</b> | SSSP2213 | <i>LDH-C1</i> | 1 |
| <b>MEL</b> | SSSP2213 | MHC-DAB       | 1 |
| <b>MEL</b> | SSSP2213 | ONE_phi2      | 1 |
| <b>MEL</b> | SSSP2213 | SSA410UO      | 1 |
| <b>MEL</b> | SSSP2213 | SSA413NV      | 1 |
| <b>MEL</b> | SSSP2213 | SSA85         | 1 |
| <b>MEL</b> | STR60    | <i>LDH-C1</i> | 1 |
| <b>MEL</b> | STR60    | MHC-DAB       | 1 |
| <b>MEL</b> | STR60    | OMM_1064      | 1 |
| <b>MEL</b> | STR60    | ONE_phi2      | 1 |
| <b>MEL</b> | STR60    | SSA408UO      | 1 |
| <b>MEL</b> | STR60    | SSA410UO      | 1 |
| <b>MEL</b> | STR60    | SSA413NV      | 1 |
| <b>MEL</b> | STR60    | SSA85         | 1 |

|            |               |               |          |
|------------|---------------|---------------|----------|
| <b>MEL</b> | STR60         | SSAD190       | 1        |
| <b>MEL</b> | STR60         | SSOSL417      | 1        |
| <b>MEL</b> | STR60         | SSSP2213      | 1        |
| <b>MEL</b> | STR60         | STR73         | 1        |
| <b>MEL</b> | STR73         | <i>LDH-C1</i> | 1        |
| <b>MEL</b> | STR73         | MHC-DAB       | 1        |
| <b>MEL</b> | STR73         | OMM_1064      | 1        |
| <b>MEL</b> | STR73         | ONE_phi2      | 1        |
| <b>MEL</b> | STR73         | SSA408UO      | 1        |
| <b>MEL</b> | STR73         | SSA410UO      | 1        |
| <b>MEL</b> | STR73         | SSA413NV      | 1        |
| <b>MEL</b> | STR73         | SSA85         | 1        |
| <b>MEL</b> | STR73         | SSAD190       | 1        |
| <b>MEL</b> | STR73         | SSOSL417      | 1        |
| <b>MEL</b> | STR73         | SSSP2213      | 1        |
| <b>RAP</b> | OMM_1064      | SSA410UO      | <b>0</b> |
| <b>RAP</b> | SSA408UO      | SSA85         | <b>0</b> |
| <b>RAP</b> | SSOSL417      | SSA408UO      | <b>0</b> |
| <b>RAP</b> | SSA408UO      | SSSP2213      | 0.18962  |
| <b>RAP</b> | SSA408UO      | ONE_phi2      | 0.23952  |
| <b>RAP</b> | SSOSL417      | SSAD190       | 0.50399  |
| <b>RAP</b> | <i>LDH-C1</i> | MHC-DAB       | 1        |
| <b>RAP</b> | OMM_1064      | <i>LDH-C1</i> | 1        |
| <b>RAP</b> | OMM_1064      | MHC-DAB       | 1        |
| <b>RAP</b> | OMM_1064      | ONE_phi2      | 1        |
| <b>RAP</b> | OMM_1064      | SSA413NV      | 1        |
| <b>RAP</b> | OMM_1064      | SSA85         | 1        |
| <b>RAP</b> | OMM_1064      | SSAD190       | 1        |
| <b>RAP</b> | OMM_1064      | SSSP2213      | 1        |
| <b>RAP</b> | ONE_phi2      | <i>LDH-C1</i> | 1        |
| <b>RAP</b> | ONE_phi2      | MHC-DAB       | 1        |
| <b>RAP</b> | ONE_phi2      | SSA410UO      | 1        |

|     |          |          |   |
|-----|----------|----------|---|
| RAP | ONE_phi2 | SSA413NV | 1 |
| RAP | SSA408UO | LDH-C1   | 1 |
| RAP | SSA408UO | MHC-DAB  | 1 |
| RAP | SSA408UO | OMM_1064 | 1 |
| RAP | SSA408UO | SSA410UO | 1 |
| RAP | SSA408UO | SSA413NV | 1 |
| RAP | SSA408UO | SSAD190  | 1 |
| RAP | SSA410UO | LDH-C1   | 1 |
| RAP | SSA410UO | MHC-DAB  | 1 |
| RAP | SSA410UO | SSA413NV | 1 |
| RAP | SSA413NV | LDH-C1   | 1 |
| RAP | SSA413NV | MHC-DAB  | 1 |
| RAP | SSA85    | LDH-C1   | 1 |
| RAP | SSA85    | MHC-DAB  | 1 |
| RAP | SSA85    | ONE_phi2 | 1 |
| RAP | SSA85    | SSA410UO | 1 |
| RAP | SSA85    | SSA413NV | 1 |
| RAP | SSAD190  | LDH-C1   | 1 |
| RAP | SSAD190  | MHC-DAB  | 1 |
| RAP | SSAD190  | ONE_phi2 | 1 |
| RAP | SSAD190  | SSA410UO | 1 |
| RAP | SSAD190  | SSA413NV | 1 |
| RAP | SSAD190  | SSA85    | 1 |
| RAP | SSAD190  | SSSP2213 | 1 |
| RAP | SSOSL417 | LDH-C1   | 1 |
| RAP | SSOSL417 | MHC-DAB  | 1 |
| RAP | SSOSL417 | OMM_1064 | 1 |
| RAP | SSOSL417 | ONE_phi2 | 1 |
| RAP | SSOSL417 | SSA410UO | 1 |
| RAP | SSOSL417 | SSA413NV | 1 |
| RAP | SSOSL417 | SSA85    | 1 |
| RAP | SSOSL417 | SSSP2213 | 1 |

|     |          |          |    |
|-----|----------|----------|----|
| RAP | SSSP2213 | LDH-C1   | 1  |
| RAP | SSSP2213 | MHC-DAB  | 1  |
| RAP | SSSP2213 | ONE_phi2 | 1  |
| RAP | SSSP2213 | SSA410UO | 1  |
| RAP | SSSP2213 | SSA413NV | 1  |
| RAP | SSSP2213 | SSA85    | 1  |
| RAP | STR73    | LDH-C1   | 1  |
| RAP | STR73    | MHC-DAB  | 1  |
| RAP | STR73    | OMM_1064 | 1  |
| RAP | STR73    | ONE_phi2 | 1  |
| RAP | STR73    | SSA408UO | 1  |
| RAP | STR73    | SSA410UO | 1  |
| RAP | STR73    | SSA413NV | 1  |
| RAP | STR73    | SSA85    | 1  |
| RAP | STR73    | SSAD190  | 1  |
| RAP | STR73    | SSOSL417 | 1  |
| RAP | STR73    | SSSP2213 | 1  |
| RAP | STR60    | LDH-C1   | na |
| RAP | STR60    | MHC-DAB  | na |
| RAP | STR60    | OMM_1064 | na |
| RAP | STR60    | ONE_phi2 | na |
| RAP | STR60    | SSA408UO | na |
| RAP | STR60    | SSA410UO | na |
| RAP | STR60    | SSA413NV | na |
| RAP | STR60    | SSA85    | na |
| RAP | STR60    | SSAD190  | na |
| RAP | STR60    | SSOSL417 | na |
| RAP | STR60    | SSSP2213 | na |
| RAP | STR60    | STR73    | na |
| SCR | LDH-C1   | MHC-DAB  | 1  |
| SCR | OMM_1064 | LDH-C1   | 1  |
| SCR | OMM_1064 | MHC-DAB  | 1  |

|     |          |          |   |
|-----|----------|----------|---|
| SCR | OMM_1064 | ONE_phi2 | 1 |
| SCR | OMM_1064 | SSA410UO | 1 |
| SCR | OMM_1064 | SSA413NV | 1 |
| SCR | OMM_1064 | SSA85    | 1 |
| SCR | OMM_1064 | SSAD190  | 1 |
| SCR | OMM_1064 | SSSP2213 | 1 |
| SCR | ONE_phi2 | LDH-C1   | 1 |
| SCR | ONE_phi2 | MHC-DAB  | 1 |
| SCR | ONE_phi2 | SSA410UO | 1 |
| SCR | ONE_phi2 | SSA413NV | 1 |
| SCR | SSA408UO | LDH-C1   | 1 |
| SCR | SSA408UO | MHC-DAB  | 1 |
| SCR | SSA408UO | OMM_1064 | 1 |
| SCR | SSA408UO | ONE_phi2 | 1 |
| SCR | SSA408UO | SSA410UO | 1 |
| SCR | SSA408UO | SSA413NV | 1 |
| SCR | SSA408UO | SSA85    | 1 |
| SCR | SSA408UO | SSAD190  | 1 |
| SCR | SSA408UO | SSSP2213 | 1 |
| SCR | SSA410UO | LDH-C1   | 1 |
| SCR | SSA410UO | MHC-DAB  | 1 |
| SCR | SSA410UO | SSA413NV | 1 |
| SCR | SSA413NV | LDH-C1   | 1 |
| SCR | SSA413NV | MHC-DAB  | 1 |
| SCR | SSA85    | LDH-C1   | 1 |
| SCR | SSA85    | MHC-DAB  | 1 |
| SCR | SSA85    | ONE_phi2 | 1 |
| SCR | SSA85    | SSA410UO | 1 |
| SCR | SSA85    | SSA413NV | 1 |
| SCR | SSAD190  | LDH-C1   | 1 |
| SCR | SSAD190  | MHC-DAB  | 1 |
| SCR | SSAD190  | ONE_phi2 | 1 |

|     |          |          |   |
|-----|----------|----------|---|
| SCR | SSAD190  | SSA410UO | 1 |
| SCR | SSAD190  | SSA413NV | 1 |
| SCR | SSAD190  | SSA85    | 1 |
| SCR | SSAD190  | SSSP2213 | 1 |
| SCR | SSOSL417 | LDH-C1   | 1 |
| SCR | SSOSL417 | MHC-DAB  | 1 |
| SCR | SSOSL417 | OMM_1064 | 1 |
| SCR | SSOSL417 | ONE_phi2 | 1 |
| SCR | SSOSL417 | SSA408UO | 1 |
| SCR | SSOSL417 | SSA410UO | 1 |
| SCR | SSOSL417 | SSA413NV | 1 |
| SCR | SSOSL417 | SSA85    | 1 |
| SCR | SSOSL417 | SSAD190  | 1 |
| SCR | SSOSL417 | SSSP2213 | 1 |
| SCR | SSSP2213 | LDH-C1   | 1 |
| SCR | SSSP2213 | MHC-DAB  | 1 |
| SCR | SSSP2213 | ONE_phi2 | 1 |
| SCR | SSSP2213 | SSA410UO | 1 |
| SCR | SSSP2213 | SSA413NV | 1 |
| SCR | SSSP2213 | SSA85    | 1 |
| SCR | STR60    | LDH-C1   | 1 |
| SCR | STR60    | MHC-DAB  | 1 |
| SCR | STR60    | OMM_1064 | 1 |
| SCR | STR60    | ONE_phi2 | 1 |
| SCR | STR60    | SSA408UO | 1 |
| SCR | STR60    | SSA410UO | 1 |
| SCR | STR60    | SSA413NV | 1 |
| SCR | STR60    | SSA85    | 1 |
| SCR | STR60    | SSAD190  | 1 |
| SCR | STR60    | SSOSL417 | 1 |
| SCR | STR60    | SSSP2213 | 1 |
| SCR | STR60    | STR73    | 1 |

|      |          |          |         |
|------|----------|----------|---------|
| SCR  | STR73    | LDH-C1   | 1       |
| SCR  | STR73    | MHC-DAB  | 1       |
| SCR  | STR73    | OMM_1064 | 1       |
| SCR  | STR73    | ONE_phi2 | 1       |
| SCR  | STR73    | SSA408UO | 1       |
| SCR  | STR73    | SSA410UO | 1       |
| SCR  | STR73    | SSA413NV | 1       |
| SCR  | STR73    | SSA85    | 1       |
| SCR  | STR73    | SSAD190  | 1       |
| SCR  | STR73    | SSOSL417 | 1       |
| SCR  | STR73    | SSSP2213 | 1       |
| SIM1 | SSAD190  | SSA410UO | 0.28443 |
| SIM1 | LDH-C1   | MHC-DAB  | 1       |
| SIM1 | OMM_1064 | LDH-C1   | 1       |
| SIM1 | OMM_1064 | MHC-DAB  | 1       |
| SIM1 | OMM_1064 | ONE_phi2 | 1       |
| SIM1 | OMM_1064 | SSA410UO | 1       |
| SIM1 | OMM_1064 | SSA413NV | 1       |
| SIM1 | OMM_1064 | SSA85    | 1       |
| SIM1 | OMM_1064 | SSAD190  | 1       |
| SIM1 | OMM_1064 | SSSP2213 | 1       |
| SIM1 | ONE_phi2 | LDH-C1   | 1       |
| SIM1 | ONE_phi2 | MHC-DAB  | 1       |
| SIM1 | ONE_phi2 | SSA410UO | 1       |
| SIM1 | ONE_phi2 | SSA413NV | 1       |
| SIM1 | SSA408UO | LDH-C1   | 1       |
| SIM1 | SSA408UO | MHC-DAB  | 1       |
| SIM1 | SSA408UO | OMM_1064 | 1       |
| SIM1 | SSA408UO | ONE_phi2 | 1       |
| SIM1 | SSA408UO | SSA410UO | 1       |
| SIM1 | SSA408UO | SSA413NV | 1       |
| SIM1 | SSA408UO | SSA85    | 1       |

|      |          |          |   |
|------|----------|----------|---|
| SIM1 | SSA408UO | SSAD190  | 1 |
| SIM1 | SSA408UO | SSSP2213 | 1 |
| SIM1 | SSA410UO | LDH-C1   | 1 |
| SIM1 | SSA410UO | MHC-DAB  | 1 |
| SIM1 | SSA410UO | SSA413NV | 1 |
| SIM1 | SSA413NV | LDH-C1   | 1 |
| SIM1 | SSA413NV | MHC-DAB  | 1 |
| SIM1 | SSA85    | LDH-C1   | 1 |
| SIM1 | SSA85    | MHC-DAB  | 1 |
| SIM1 | SSA85    | ONE_phi2 | 1 |
| SIM1 | SSA85    | SSA410UO | 1 |
| SIM1 | SSA85    | SSA413NV | 1 |
| SIM1 | SSAD190  | LDH-C1   | 1 |
| SIM1 | SSAD190  | MHC-DAB  | 1 |
| SIM1 | SSAD190  | ONE_phi2 | 1 |
| SIM1 | SSAD190  | SSA413NV | 1 |
| SIM1 | SSAD190  | SSA85    | 1 |
| SIM1 | SSAD190  | SSSP2213 | 1 |
| SIM1 | SSOSL417 | LDH-C1   | 1 |
| SIM1 | SSOSL417 | MHC-DAB  | 1 |
| SIM1 | SSOSL417 | OMM_1064 | 1 |
| SIM1 | SSOSL417 | ONE_phi2 | 1 |
| SIM1 | SSOSL417 | SSA408UO | 1 |
| SIM1 | SSOSL417 | SSA410UO | 1 |
| SIM1 | SSOSL417 | SSA413NV | 1 |
| SIM1 | SSOSL417 | SSA85    | 1 |
| SIM1 | SSOSL417 | SSAD190  | 1 |
| SIM1 | SSOSL417 | SSSP2213 | 1 |
| SIM1 | SSSP2213 | LDH-C1   | 1 |
| SIM1 | SSSP2213 | MHC-DAB  | 1 |
| SIM1 | SSSP2213 | ONE_phi2 | 1 |
| SIM1 | SSSP2213 | SSA410UO | 1 |



|             |          |                |   |
|-------------|----------|----------------|---|
| <b>SIM1</b> | SSSP2213 | SSA413NV       | 1 |
| <b>SIM1</b> | SSSP2213 | SSA85          | 1 |
| <b>SIM1</b> | STR60    | <i>LDH-C1</i>  | 1 |
| <b>SIM1</b> | STR60    | <i>MHC-DAB</i> | 1 |
| <b>SIM1</b> | STR60    | OMM_1064       | 1 |
| <b>SIM1</b> | STR60    | ONE_phi2       | 1 |
| <b>SIM1</b> | STR60    | SSA408UO       | 1 |
| <b>SIM1</b> | STR60    | SSA410UO       | 1 |
| <b>SIM1</b> | STR60    | SSA413NV       | 1 |
| <b>SIM1</b> | STR60    | SSA85          | 1 |
| <b>SIM1</b> | STR60    | SSAD190        | 1 |
| <b>SIM1</b> | STR60    | SSOSL417       | 1 |
| <b>SIM1</b> | STR60    | SSSP2213       | 1 |
| <b>SIM1</b> | STR60    | STR73          | 1 |
| <b>SIM1</b> | STR73    | <i>LDH-C1</i>  | 1 |
| <b>SIM1</b> | STR73    | <i>MHC-DAB</i> | 1 |
| <b>SIM1</b> | STR73    | OMM_1064       | 1 |
| <b>SIM1</b> | STR73    | ONE_phi2       | 1 |
| <b>SIM1</b> | STR73    | SSA408UO       | 1 |
| <b>SIM1</b> | STR73    | SSA410UO       | 1 |
| <b>SIM1</b> | STR73    | SSA413NV       | 1 |
| <b>SIM1</b> | STR73    | SSA85          | 1 |
| <b>SIM1</b> | STR73    | SSAD190        | 1 |
| <b>SIM1</b> | STR73    | SSOSL417       | 1 |
| <b>SIM1</b> | STR73    | SSSP2213       | 1 |
| <b>SIM2</b> | ONE_phi2 | <i>LDH-C1</i>  | 1 |
| <b>SIM2</b> | ONE_phi2 | SSA410UO       | 1 |
| <b>SIM2</b> | ONE_phi2 | SSA413NV       | 1 |
| <b>SIM2</b> | SSA408UO | <i>LDH-C1</i>  | 1 |
| <b>SIM2</b> | SSA408UO | ONE_phi2       | 1 |
| <b>SIM2</b> | SSA408UO | SSA410UO       | 1 |
| <b>SIM2</b> | SSA408UO | SSA413NV       | 1 |

|             |          |               |   |
|-------------|----------|---------------|---|
| <b>SIM2</b> | SSA408UO | SSA85         | 1 |
| <b>SIM2</b> | SSA408UO | SSAD190       | 1 |
| <b>SIM2</b> | SSA408UO | SSSP2213      | 1 |
| <b>SIM2</b> | SSA410UO | <i>LDH-C1</i> | 1 |
| <b>SIM2</b> | SSA410UO | SSA413NV      | 1 |
| <b>SIM2</b> | SSA413NV | <i>LDH-C1</i> | 1 |
| <b>SIM2</b> | SSA85    | <i>LDH-C1</i> | 1 |
| <b>SIM2</b> | SSA85    | ONE_phi2      | 1 |
| <b>SIM2</b> | SSA85    | SSA410UO      | 1 |
| <b>SIM2</b> | SSA85    | SSA413NV      | 1 |
| <b>SIM2</b> | SSAD190  | <i>LDH-C1</i> | 1 |
| <b>SIM2</b> | SSAD190  | ONE_phi2      | 1 |
| <b>SIM2</b> | SSAD190  | SSA410UO      | 1 |
| <b>SIM2</b> | SSAD190  | SSA413NV      | 1 |
| <b>SIM2</b> | SSAD190  | SSA85         | 1 |
| <b>SIM2</b> | SSAD190  | SSSP2213      | 1 |
| <b>SIM2</b> | SSOSL417 | <i>LDH-C1</i> | 1 |
| <b>SIM2</b> | SSOSL417 | ONE_phi2      | 1 |
| <b>SIM2</b> | SSOSL417 | SSA408UO      | 1 |
| <b>SIM2</b> | SSOSL417 | SSA410UO      | 1 |
| <b>SIM2</b> | SSOSL417 | SSA413NV      | 1 |
| <b>SIM2</b> | SSOSL417 | SSA85         | 1 |
| <b>SIM2</b> | SSOSL417 | SSAD190       | 1 |
| <b>SIM2</b> | SSOSL417 | SSSP2213      | 1 |
| <b>SIM2</b> | SSSP2213 | <i>LDH-C1</i> | 1 |
| <b>SIM2</b> | SSSP2213 | ONE_phi2      | 1 |
| <b>SIM2</b> | SSSP2213 | SSA410UO      | 1 |
| <b>SIM2</b> | SSSP2213 | SSA413NV      | 1 |
| <b>SIM2</b> | SSSP2213 | SSA85         | 1 |
| <b>SIM2</b> | STR60    | <i>LDH-C1</i> | 1 |
| <b>SIM2</b> | STR60    | ONE_phi2      | 1 |
| <b>SIM2</b> | STR60    | SSA408UO      | 1 |

|             |               |                |    |
|-------------|---------------|----------------|----|
| <b>SIM2</b> | STR60         | SSA410UO       | 1  |
| <b>SIM2</b> | STR60         | SSA413NV       | 1  |
| <b>SIM2</b> | STR60         | SSA85          | 1  |
| <b>SIM2</b> | STR60         | SSAD190        | 1  |
| <b>SIM2</b> | STR60         | SSOSL417       | 1  |
| <b>SIM2</b> | STR60         | SSSP2213       | 1  |
| <b>SIM2</b> | STR60         | STR73          | 1  |
| <b>SIM2</b> | STR73         | <i>LDH-C1</i>  | 1  |
| <b>SIM2</b> | STR73         | ONE_phi2       | 1  |
| <b>SIM2</b> | STR73         | SSA408UO       | 1  |
| <b>SIM2</b> | STR73         | SSA410UO       | 1  |
| <b>SIM2</b> | STR73         | SSA413NV       | 1  |
| <b>SIM2</b> | STR73         | SSA85          | 1  |
| <b>SIM2</b> | STR73         | SSAD190        | 1  |
| <b>SIM2</b> | STR73         | SSOSL417       | 1  |
| <b>SIM2</b> | STR73         | SSSP2213       | 1  |
| <b>SIM2</b> | <i>LDH-C1</i> | <i>MHC-DAB</i> | na |
| <b>SIM2</b> | OMM_1064      | <i>LDH-C1</i>  | na |
| <b>SIM2</b> | OMM_1064      | <i>MHC-DAB</i> | na |
| <b>SIM2</b> | OMM_1064      | ONE_phi2       | na |
| <b>SIM2</b> | OMM_1064      | SSA410UO       | na |
| <b>SIM2</b> | OMM_1064      | SSA413NV       | na |
| <b>SIM2</b> | OMM_1064      | SSA85          | na |
| <b>SIM2</b> | OMM_1064      | SSAD190        | na |
| <b>SIM2</b> | OMM_1064      | SSSP2213       | na |
| <b>SIM2</b> | ONE_phi2      | <i>MHC-DAB</i> | na |
| <b>SIM2</b> | SSA408UO      | <i>MHC-DAB</i> | na |
| <b>SIM2</b> | SSA408UO      | OMM_1064       | na |
| <b>SIM2</b> | SSA410UO      | <i>MHC-DAB</i> | na |
| <b>SIM2</b> | SSA413NV      | <i>MHC-DAB</i> | na |
| <b>SIM2</b> | SSA85         | <i>MHC-DAB</i> | na |
| <b>SIM2</b> | SSAD190       | <i>MHC-DAB</i> | na |

|             |               |               |          |
|-------------|---------------|---------------|----------|
| <b>SIM2</b> | SSOSL417      | MHC-DAB       | na       |
| <b>SIM2</b> | SSOSL417      | OMM_1064      | na       |
| <b>SIM2</b> | SSSP2213      | MHC-DAB       | na       |
| <b>SIM2</b> | STR60         | MHC-DAB       | na       |
| <b>SIM2</b> | STR60         | OMM_1064      | na       |
| <b>SIM2</b> | STR73         | MHC-DAB       | na       |
| <b>SIM2</b> | STR73         | OMM_1064      | na       |
| <b>TRO</b>  | SSOSL417      | SSAD190       | <b>0</b> |
| <b>TRO</b>  | STR73         | SSOSL417      | <b>0</b> |
| <b>TRO</b>  | <i>LDH-C1</i> | MHC-DAB       | 1        |
| <b>TRO</b>  | OMM_1064      | <i>LDH-C1</i> | 1        |
| <b>TRO</b>  | OMM_1064      | MHC-DAB       | 1        |
| <b>TRO</b>  | OMM_1064      | ONE_phi2      | 1        |
| <b>TRO</b>  | OMM_1064      | SSA410UO      | 1        |
| <b>TRO</b>  | OMM_1064      | SSA413NV      | 1        |
| <b>TRO</b>  | OMM_1064      | SSA85         | 1        |
| <b>TRO</b>  | OMM_1064      | SSAD190       | 1        |
| <b>TRO</b>  | OMM_1064      | SSSP2213      | 1        |
| <b>TRO</b>  | ONE_phi2      | <i>LDH-C1</i> | 1        |
| <b>TRO</b>  | ONE_phi2      | MHC-DAB       | 1        |
| <b>TRO</b>  | ONE_phi2      | SSA410UO      | 1        |
| <b>TRO</b>  | ONE_phi2      | SSA413NV      | 1        |
| <b>TRO</b>  | SSA408UO      | <i>LDH-C1</i> | 1        |
| <b>TRO</b>  | SSA408UO      | MHC-DAB       | 1        |
| <b>TRO</b>  | SSA408UO      | OMM_1064      | 1        |
| <b>TRO</b>  | SSA408UO      | ONE_phi2      | 1        |
| <b>TRO</b>  | SSA408UO      | SSA410UO      | 1        |
| <b>TRO</b>  | SSA408UO      | SSA413NV      | 1        |
| <b>TRO</b>  | SSA408UO      | SSA85         | 1        |

|            |          |               |   |
|------------|----------|---------------|---|
| <b>TRO</b> | SSA408UO | SSAD190       | 1 |
| <b>TRO</b> | SSA408UO | SSSP2213      | 1 |
| <b>TRO</b> | SSA410UO | <i>LDH-C1</i> | 1 |
| <b>TRO</b> | SSA410UO | MHC-DAB       | 1 |
| <b>TRO</b> | SSA410UO | SSA413NV      | 1 |
| <b>TRO</b> | SSA413NV | <i>LDH-C1</i> | 1 |
| <b>TRO</b> | SSA413NV | MHC-DAB       | 1 |
| <b>TRO</b> | SSA85    | <i>LDH-C1</i> | 1 |
| <b>TRO</b> | SSA85    | MHC-DAB       | 1 |
| <b>TRO</b> | SSA85    | ONE_phi2      | 1 |
| <b>TRO</b> | SSA85    | SSA410UO      | 1 |
| <b>TRO</b> | SSA85    | SSA413NV      | 1 |
| <b>TRO</b> | SSAD190  | <i>LDH-C1</i> | 1 |
| <b>TRO</b> | SSAD190  | MHC-DAB       | 1 |
| <b>TRO</b> | SSAD190  | ONE_phi2      | 1 |
| <b>TRO</b> | SSAD190  | SSA410UO      | 1 |
| <b>TRO</b> | SSAD190  | SSA413NV      | 1 |
| <b>TRO</b> | SSAD190  | SSA85         | 1 |
| <b>TRO</b> | SSAD190  | SSSP2213      | 1 |
| <b>TRO</b> | SSOSL417 | <i>LDH-C1</i> | 1 |
| <b>TRO</b> | SSOSL417 | MHC-DAB       | 1 |
| <b>TRO</b> | SSOSL417 | OMM_1064      | 1 |
| <b>TRO</b> | SSOSL417 | ONE_phi2      | 1 |
| <b>TRO</b> | SSOSL417 | SSA408UO      | 1 |
| <b>TRO</b> | SSOSL417 | SSA410UO      | 1 |
| <b>TRO</b> | SSOSL417 | SSA413NV      | 1 |
| <b>TRO</b> | SSOSL417 | SSA85         | 1 |
| <b>TRO</b> | SSOSL417 | SSSP2213      | 1 |
| <b>TRO</b> | SSSP2213 | <i>LDH-C1</i> | 1 |

|            |          |               |   |
|------------|----------|---------------|---|
| <b>TRO</b> | SSSP2213 | MHC-DAB       | 1 |
| <b>TRO</b> | SSSP2213 | ONE_phi2      | 1 |
| <b>TRO</b> | SSSP2213 | SSA410UO      | 1 |
| <b>TRO</b> | SSSP2213 | SSA413NV      | 1 |
| <b>TRO</b> | SSSP2213 | SSA85         | 1 |
| <b>TRO</b> | STR60    | <i>LDH-C1</i> | 1 |
| <b>TRO</b> | STR60    | MHC-DAB       | 1 |
| <b>TRO</b> | STR60    | OMM_1064      | 1 |
| <b>TRO</b> | STR60    | ONE_phi2      | 1 |
| <b>TRO</b> | STR60    | SSA408UO      | 1 |
| <b>TRO</b> | STR60    | SSA410UO      | 1 |
| <b>TRO</b> | STR60    | SSA413NV      | 1 |
| <b>TRO</b> | STR60    | SSA85         | 1 |
| <b>TRO</b> | STR60    | SSAD190       | 1 |
| <b>TRO</b> | STR60    | SSOSL417      | 1 |
| <b>TRO</b> | STR60    | SSSP2213      | 1 |
| <b>TRO</b> | STR60    | STR73         | 1 |
| <b>TRO</b> | STR73    | <i>LDH-C1</i> | 1 |
| <b>TRO</b> | STR73    | MHC-DAB       | 1 |
| <b>TRO</b> | STR73    | OMM_1064      | 1 |
| <b>TRO</b> | STR73    | ONE_phi2      | 1 |
| <b>TRO</b> | STR73    | SSA408UO      | 1 |
| <b>TRO</b> | STR73    | SSA410UO      | 1 |
| <b>TRO</b> | STR73    | SSA413NV      | 1 |
| <b>TRO</b> | STR73    | SSA85         | 1 |
| <b>TRO</b> | STR73    | SSAD190       | 1 |
| <b>TRO</b> | STR73    | SSSP2213      | 1 |

**Table S6**

Population-pairwise genetic distances (below the diagonal): (a)  $\Phi_{ST}$  based on mitochondrial control region (CR); (b)  $F_{ST}$  based on MHC, and (c) MHC and 11 STR loci. The respective significance thresholds (\* =  $p < 0.05$ ; \*\*\* =  $p < 0.001$ ; ns = not significant) after Bonferroni correction are given above the diagonal.

**a**

| CR $\Phi_{ST}$ | CAR   | MEL   | RAP   | SCR   | SIM1   | SIM2  | TRO |
|----------------|-------|-------|-------|-------|--------|-------|-----|
| CAR            | -     | ***   | ***   | ***   | ***    | ***   | *** |
| MEL            | 0.987 | -     | ***   | ***   | ***    | ***   | *** |
| RAP            | 0.744 | 0.802 | -     | ***   | ***    | ***   | ns  |
| SCR            | 0.717 | 0.744 | 0.552 | -     | ***    | ***   | *** |
| SIM1           | 0.755 | 0.760 | 0.180 | 0.480 | -      | ns    | *** |
| SIM2           | 0.746 | 0.727 | 0.189 | 0.438 | -0.055 | -     | *** |
| TRO            | 0.661 | 0.751 | 0.193 | 0.430 | 0.300  | 0.286 | -   |

**b**

| MHC- $F_{ST}$ | CAR   | MEL   | RAP   | SCR   | SIM1  | SIM2  | TRO |
|---------------|-------|-------|-------|-------|-------|-------|-----|
| CAR           | -     | ***   | ***   | ***   | ***   | ***   | *** |
| MEL           | 0.177 | -     | ***   | ***   | ***   | ***   | *** |
| RAP           | 0.178 | 0.158 | -     | ***   | ***   | ***   | *   |
| SCR           | 0.214 | 0.205 | 0.205 | -     | ***   | ***   | *** |
| SIM1          | 0.136 | 0.148 | 0.145 | 0.207 | -     | ns    | *** |
| SIM2          | 0.119 | 0.106 | 0.118 | 0.161 | 0.022 | -     | *** |
| TRO           | 0.135 | 0.113 | 0.048 | 0.162 | 0.109 | 0.068 | -   |

**c**

| STR- $F_{ST}$ | CAR   | MEL   | RAP   | SCR   | SIM1  | SIM2  | TRO |
|---------------|-------|-------|-------|-------|-------|-------|-----|
| CAR           | -     | ***   | ***   | ***   | ***   | ***   | *** |
| MEL           | 0.288 | -     | ***   | ***   | ***   | ***   | *** |
| RAP           | 0.267 | 0.102 | -     | ***   | ***   | ***   | *** |
| SCR           | 0.392 | 0.354 | 0.313 | -     | ***   | ***   | *** |
| SIM1          | 0.209 | 0.136 | 0.114 | 0.327 | -     | ns    | *** |
| SIM2          | 0.215 | 0.111 | 0.104 | 0.319 | 0.001 | -     | *** |
| TRO           | 0.224 | 0.113 | 0.088 | 0.334 | 0.087 | 0.080 | -   |

**Table S7**

F-statistics across all populations for 11 microsatellite loci.

| Locus       | Fis    | Fit   | Fst   |
|-------------|--------|-------|-------|
| STR60       | -0.010 | 0.065 | 0.074 |
| STR73       | -0.042 | 0.206 | 0.237 |
| SSOSL417    | -0.007 | 0.163 | 0.169 |
| SSA408UOS   | -0.036 | 0.070 | 0.102 |
| OMM_1064    | -0.031 | 0.162 | 0.187 |
| SSAD190     | 0.010  | 0.152 | 0.144 |
| SSSP2213    | 0.014  | 0.169 | 0.158 |
| SSA85       | -0.021 | 0.305 | 0.319 |
| ONE_mu2     | 0.127  | 0.347 | 0.252 |
| SSA410UOS   | 0.028  | 0.166 | 0.142 |
| SSA413NVH   | -0.009 | 0.258 | 0.265 |
| <b>Mean</b> | 0.002  | 0.188 | 0.186 |
| <b>SE</b>   | 0.014  | 0.026 | 0.022 |

**Table S8**

Results of the GENECLASS assignment test. The number of individuals correctly assigned to their sampling site (bold), to other sites, or not assigned ( $p < 0.05$ ), along with the percentage of per-site correctly assigned individuals are provided.

| Site<br>(sample size) | Assigned  |           |           |           |           |           |           | Unassigned | Correctly<br>assigned<br>individuals (%) |
|-----------------------|-----------|-----------|-----------|-----------|-----------|-----------|-----------|------------|------------------------------------------|
|                       | CAR       | MEL       | RAP       | SCR       | SIM1      | SIM2      | TRO       |            |                                          |
| CAR (30)              | <b>28</b> | -         | -         | -         | -         | -         | -         | 2          | 93.3                                     |
| MEL (30)              | -         | <b>29</b> | -         | -         | -         | -         | -         | 1          | 96.7                                     |
| RAP (30)              | -         | -         | <b>26</b> | -         | -         | -         | -         | 4          | 86.6                                     |
| SCR (30)              | -         | -         | -         | <b>27</b> | -         | -         | -         | 3          | 90.0                                     |
| SIM1 (16)             | -         | -         | -         | -         | <b>9</b>  | 5         | -         | 2          | 56.3                                     |
| SIM2 (14)             | -         | -         | -         | -         | 5         | <b>7</b>  | -         | 2          | 50.0                                     |
| TRO (25)              | -         | -         | -         | -         | -         | -         | <b>25</b> | 0          | 100.0                                    |
| <i>Total</i>          | <i>28</i> | <i>29</i> | <i>26</i> | <i>27</i> | <i>14</i> | <i>12</i> | <i>25</i> | <i>14</i>  | <i>86.3</i>                              |

**Figure S1**

Relative abundance of alleles of the microsatellite locus SSA85 in seven examined Mediterranean brown trout sites.

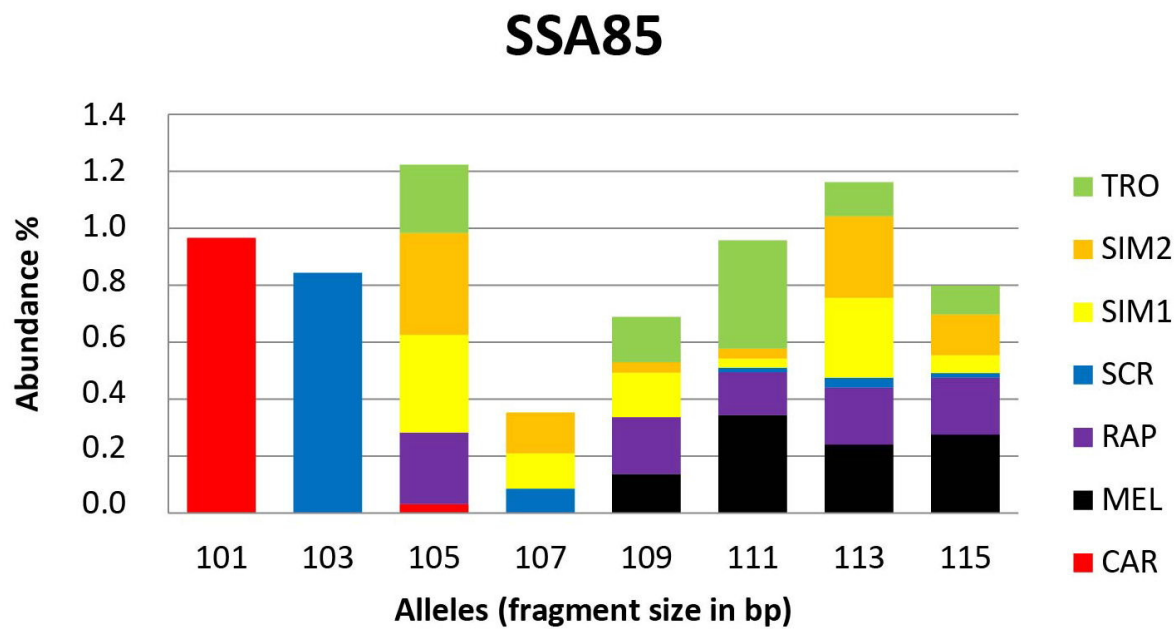

**Figure S2**

Inference of the optimal number of STRUCTURE clusters inferred by Evanno (above) and Pritchard (below) methods. The red line shows the best K for each method.

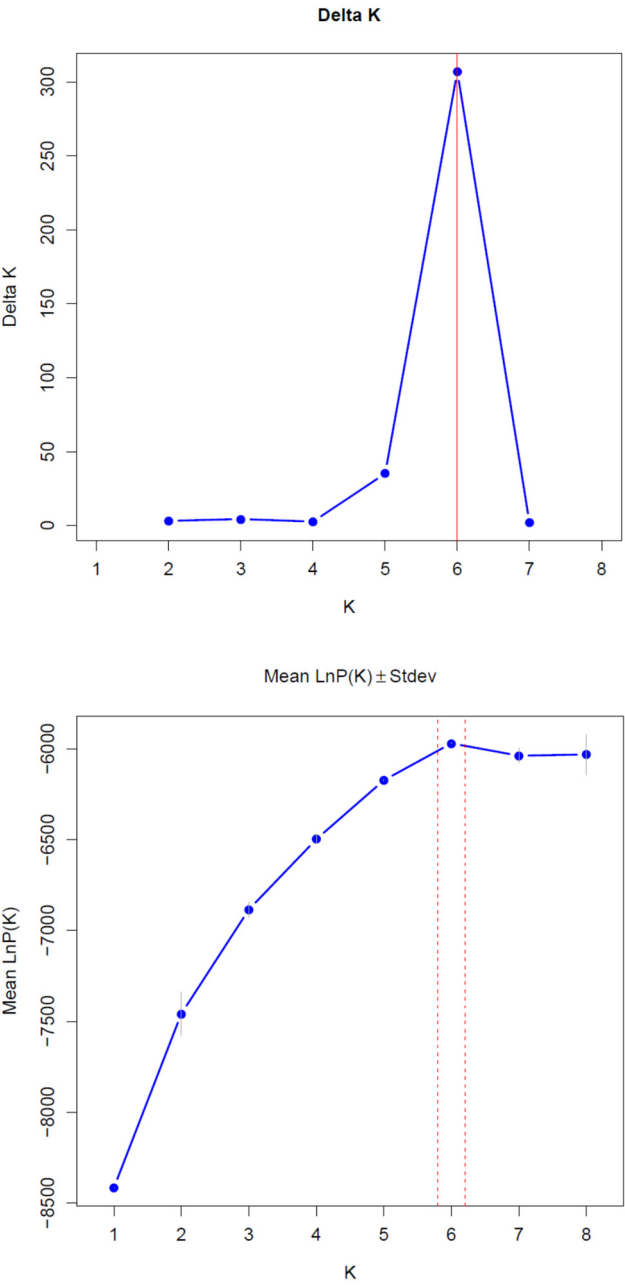

**Figure S3**

Results of the Bayesian clustering analysis in STRUCTURE for each K in the range 2 - 8.

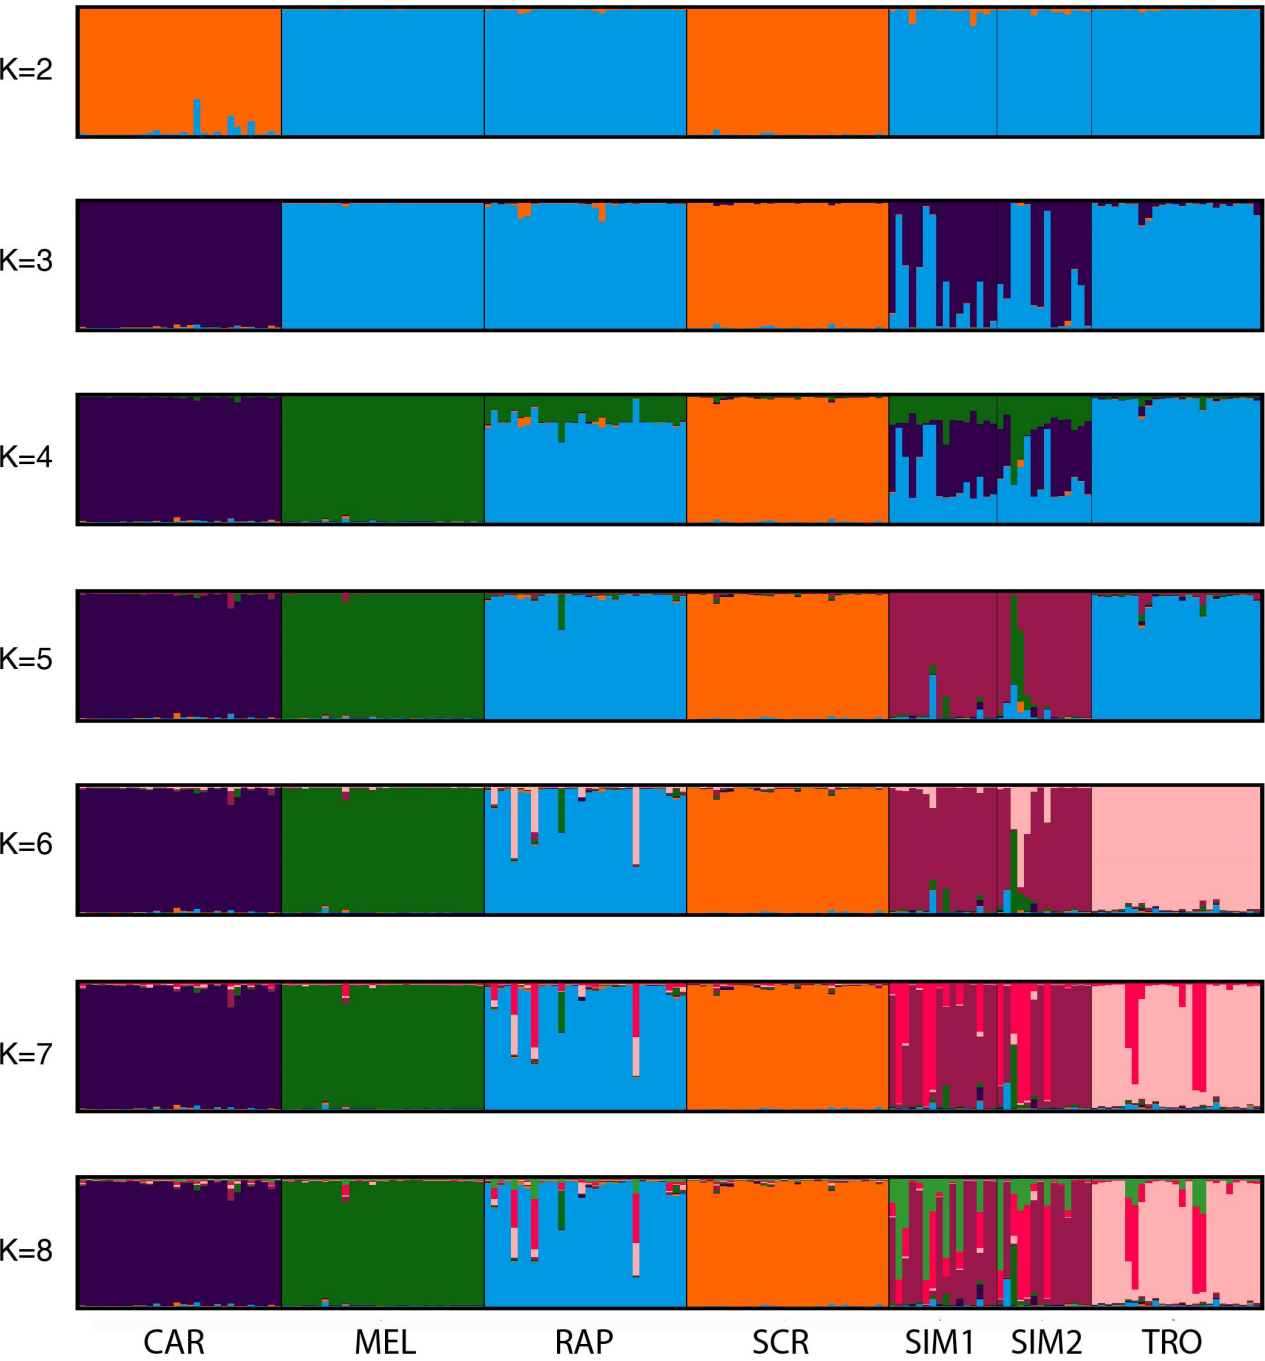



**Figure S4**

Bayesian Information Criterion (BIC) values for the increasing number of clusters (K). Red dots indicate the most supported K values according to the visual inspection of the BIC pattern.

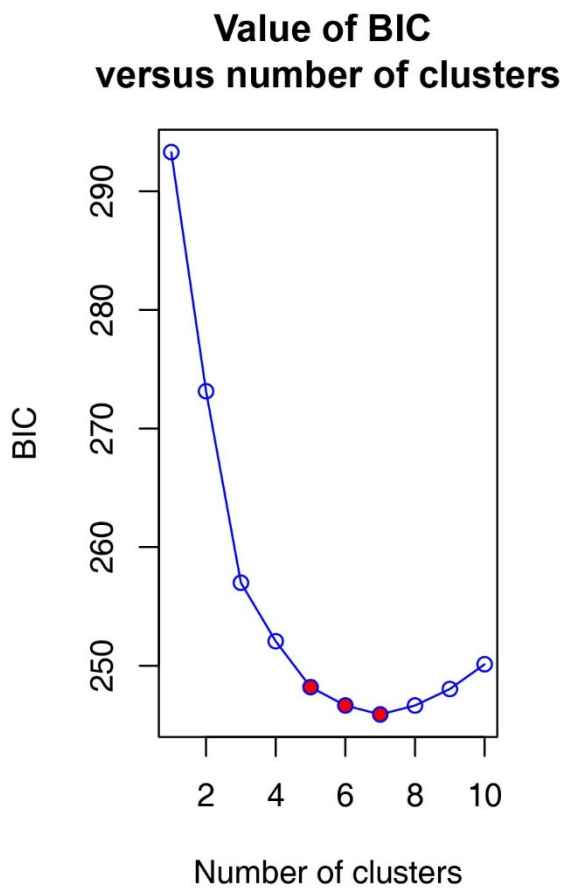

Supplement: s1 [file s1]
